# Supplementary material for: Bio-inspired, UV-blocking, water-stable and antioxidant lignin/cellulose films combining high strength, toughness and flexibility
Source: Royal Society of Chemistry journal article supplement (doi:10.1039/d2qm00842d), 2023-01-01
Supplement: d2qm00842d1.pdf [file d2qm00842d1.pdf]

*Supplementary material:*

## **Bio-inspired, UV-blocking, water-stable and antioxidant lignin/cellulose films combining high strength, toughness and flexibility**

Boyu Cui<sup>1a</sup>, Liangxian Liu<sup>1a</sup>, Shuang Li, Wen Wang, Chaodong Liu, Lei Tan, Weihong Wang\*

Key Laboratory of Bio-Based Material Science and Technology (Ministry of Education), Material Science and Engineering College, Northeast Forestry University, Harbin 150040, China

\* Correspondence: [weihongwang2001@nefu.edu.cn](mailto:weihongwang2001@nefu.edu.cn) (Weihong Wang).

| Sample code | Process parameters |                        |                                              | Ultrasonic treatment | Density (g cm <sup>-1</sup> ) | ZnCl <sub>2</sub> in final films (%) |
|-------------|--------------------|------------------------|----------------------------------------------|----------------------|-------------------------------|--------------------------------------|
|             | Cellulose (g)      | Lignin/acetone (mg/ml) | ZnCl <sub>2</sub> /H <sub>2</sub> O (g/100g) |                      |                               |                                      |
| C           | 0.5                | 0                      | 0                                            | No                   | 1.09                          | 0                                    |
| UC          | 0.5                | 0                      | 0                                            | Yes                  | 1.14                          | 0                                    |
| UCZn-15     | 0.5                | 0                      | 15                                           | Yes                  | 1.14                          | 1.71                                 |
| UCL         | 0.5                | 30                     | 0                                            | Yes                  | 1.17                          | 0                                    |
| UCLZn-15    | 0.5                | 30                     | 15                                           | Yes                  | 1.19                          | 1.63                                 |
| UCLZn-30    | 0.5                | 30                     | 30                                           | Yes                  | 1.19                          | 2.74                                 |
| UCLZn-45    | 0.5                | 30                     | 45                                           | Yes                  | 1.19                          | 3.61                                 |

**Table S1.** Films with different process parameters.

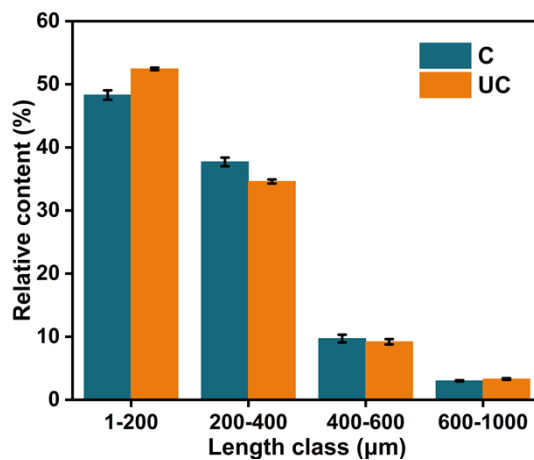

Figure S1. The basic length range of C and UC determined by L&W Fiber tester plus (Sweden).

The MFC length ranges were mainly 1–200 μm (approximately 48.3%) and 200–400 μm (approximately 37.7%). After ultrasonic treatment, the MFC ranges were mainly 1–200 μm (approximately 52.4%) and 200–400 μm (approximately 34.7%).

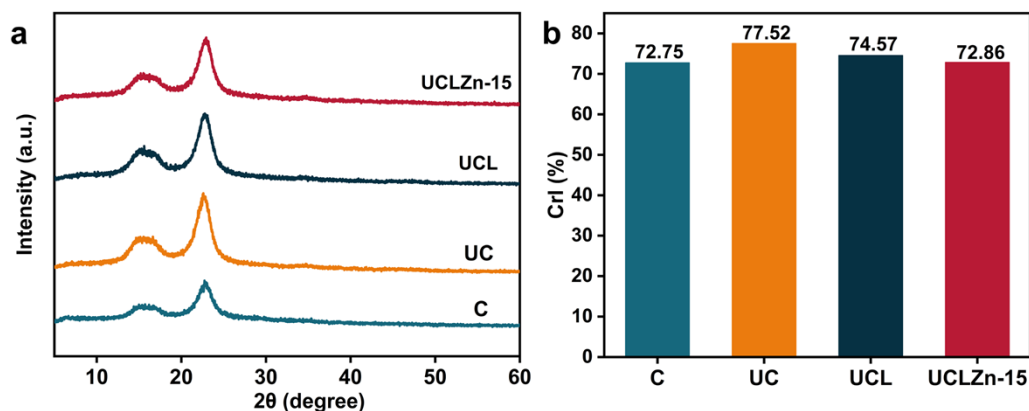

Figure S2 X-ray diffraction pattern (a) and CrI of C, UC, UCL, and UCLZn-15 (b).

To characterize the crystallization of the films, we performed XRD tests. The crystallinity of the cellulose film was 72.75%, whereas the UC films exhibited a high degree of crystallinity of up to 77.52% after ultrasound treatment, which was attributed to the amorphous cellulose removal and degraded of partially amorphous cellulose. After the addition of lignin, the non-crystalline lignin attenuated the crystallinity of the material. With the addition of  $\text{Zn}^{2+}$ , the crystallinity of the film decreased to 72.86%, illustrating that the crystal structure of the material was changed, which may be attributed to the coordination interactions of cellulose hydroxyl groups and lignin oxygen-containing groups with  $\text{Zn}^{2+}$ .

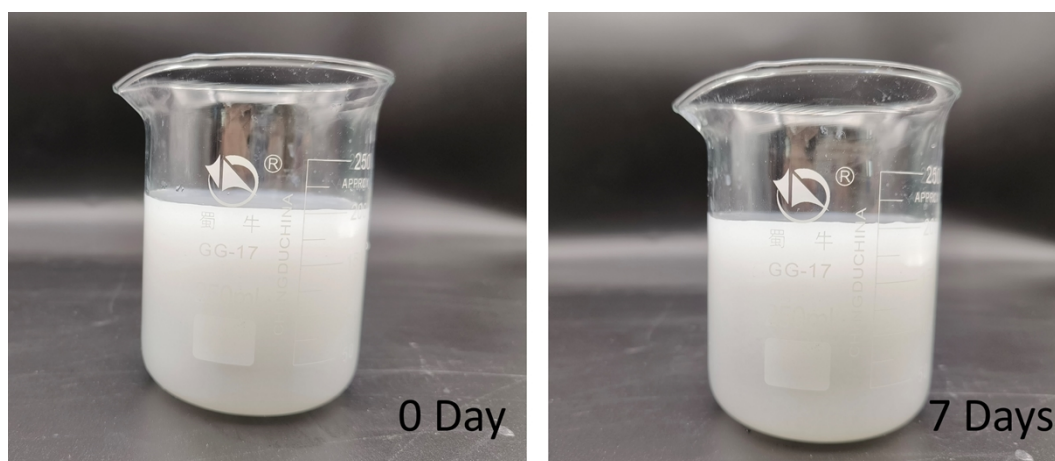

Figure S3. Electronic photo of 0.5%wt ultrasound MFC after sonication.

After sonication, the MFC aqueous suspension has good homogeneity and remains homogeneous without stratification after one week of resting. This is attributed to the higher WRV of the fibers after sonication.

|                                            | Strength<br>(Mpa) | Elongation at<br>break (%) | Toughness<br>(MJ/m <sup>3</sup> ) | Ref |
|--------------------------------------------|-------------------|----------------------------|-----------------------------------|-----|
| <b>This work</b>                           | <b>138.14</b>     | <b>47.78%</b>              | <b>12.88</b>                      |     |
| lignocellulosic<br>bioplastic              | 128               | -                          | 2.8                               | 1   |
| LM film                                    | 10.37             | -                          | 11.2                              | 2   |
| cellulose-<br>lignin-<br>glucomannan       | 110.47            | 8.27                       | -                                 | 3   |
| cellulose/lignin<br>straw                  | 75.2              | -                          | -                                 | 4   |
| lignin-<br>containing<br>cationic wood     | 70.7              | 4                          | -                                 | 5   |
| cellulose/lignin<br>Composite Film         | 74.3-79.2         | 19                         | -                                 | 6   |
| phosphorylated<br>cellulose<br>nanofibrils | 92.7              | 11.9                       | 7.7                               | 7   |
| cellulose-lignin<br>biodegradable<br>film  | 92                | 6                          | -                                 | 8   |
| cellulose/lignin<br>bulk                   | 198               | -                          | 8.5                               | 9   |

**Table S2.** Films with different process parameters. (“-” Represents not mentioned).

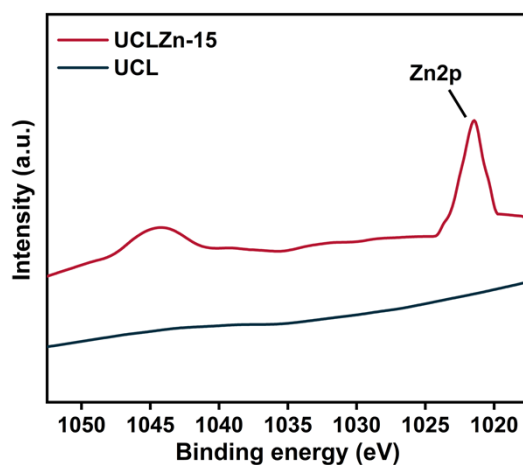

Figure S4 XPS spectra of UCLZn15 and UCL.

Compared to UCL, UCLZn-15 produced a new peak at 1021.7 eV, attributed to the Zn  $2p_{2/3}$  binding energy after the addition of  $\text{Zn}^{2+}$ .

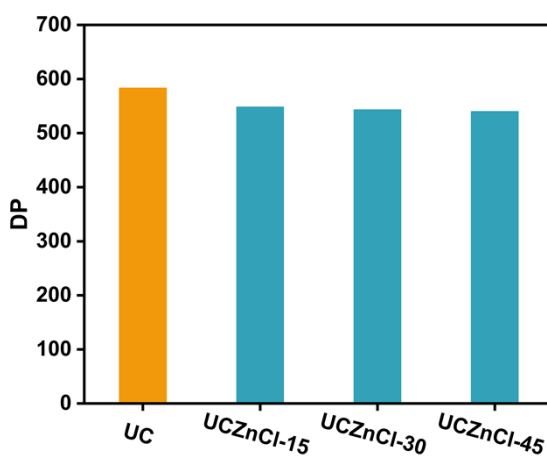

Figure S5 The DP of ultrasonic cellulose before and after  $\text{ZnCl}_2$  treatment.

The HCl used in the preparation process was mainly used to prevent the hydrolysis of  $\text{ZnCl}_2$ , and the acidic  $\text{ZnCl}_2$  did not cause serious hydrolysis of cellulose.

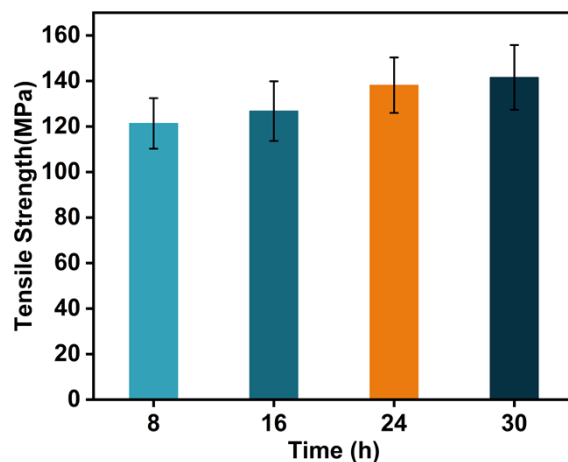

Figure S6 Tensile strength of films with different time of impregnation in the lignin/acetone solution. The lignin content of the UCZn-15 films gradually increased as the films were impregnated in the lignin/acetone solution for increasing periods of time, reaching 9.78%, 13.2%, 16.8% and 18.1%, respectively. The films impregnated with 24h of lignin/acetone showed the best mechanical properties, indicating that lignin bound best to cellulose at this concentration. Longer impregnation times (>24h) did not significantly improve the lignin content or the mechanical properties.

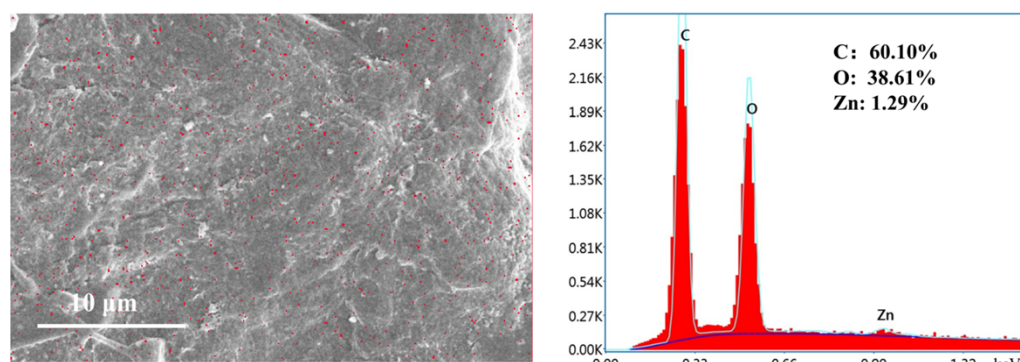

Figure S7 SEM micrographs and corresponding surface layer element scanning results (EDS) of the UCLZn-15.

The characteristic element “Zn” (red spots) was uniformly distributed on the film surface. The relative amounts of C, O, and Zn were 60.10%, 38.61%, and 1.29%, respectively.

1. Q. Xia, C. Chen, Y. Yao, J. Li, S. He, Y. Zhou, T. Li, X. Pan, Y. Yao and L. Hu, A strong, biodegradable and recyclable lignocellulosic bioplastic (vol 4, pg 627, 2021), *Nature Sustainability*, 2021, 4.
2. Y. Song, Y. Xu, D. Li, S. Chen and F. Xu, Sustainable and Superhydrophobic Lignocellulose-Based Transparent Films with Efficient Light Management and Self-Cleaning, *ACS Applied Materials & Interfaces*, 2021, **13**, 49340-49347.
3. L. Liu, B. Cui, L. Tan and W. Wang, Improving the combination of cellulose and lignin using xylan as a compatibilizer, *Cellulose*, 2021, **28**, 5335-5349.
4. X. Wang, Q. Xia, S. Jing, C. Li, Q. Chen, B. Chen, Z. Pang, B. Jiang, W. Gan, G. Chen, M. Cui, L. Hu and T. Li, Strong, Hydrostable, and Degradable Straws Based on Cellulose-Lignin Reinforced Composites, *Small*, 2021, **17**, 2008011.
5. J. A. Sirviö, M. Y. Ismail, K. Zhang, M. V. Tejesvi and A. Ämmälä, Transparent lignin-containing wood nanofiber films with UV-blocking, oxygen barrier, and anti-microbial properties, *Journal of Materials Chemistry A*, 2020, **8**, 7935-7946.
6. F. Yang, L. Xu, G. Dai, L. Luo, K. Yang, C. Huang, D. Tian and F. Shen, Conversion of Cellulose and Lignin Residues into Transparent UV-Blocking Composite Films, *Journal*, 2022, **27**.
7. S. Zhang, S.-N. Li, Q. Wu, Q. Li, J. Huang, W. Li, W. Zhang and S. Wang, Phosphorus containing group and lignin toward intrinsically flame retardant cellulose nanofibril-based film with enhanced mechanical properties, *Composites Part B: Engineering*, 2021, **212**, 108699.
8. H. Sadeghifar, R. Venditti, J. Jur, R. E. Gorga and J. J. Pawlak, Cellulose-Lignin Biodegradable and Flexible UV Protection Film, *ACS Sustainable Chemistry & Engineering*, 2017, **5**, 625-631.
9. Z. Zhu, W. Wang, Z. Liu, C. Gao, N. Xia, P. Fatehi, F. Kong and S. Wang, High-strength, lightweight and sustainable lignin contained cellulose nanofiber bulk materials for plastic replacement, *Industrial Crops and Products*, 2022, **185**, 115106.
